# Supplementary material for: Reversible step spin crossover modulation via water absorption and dehydration in a 3D Hofmann-type framework
Source: Royal Society of Chemistry journal article supplement (doi:10.1039/d1qi00731a), 2021-01-01
Supplement: d1qi00731a1.pdf [file d1qi00731a1.pdf]

## Supporting Information

# Reversible step spin crossover modulation via water absorption and dehydration in a 3D Hofmann-type framework

Kai-Ting Lian, Wei-Wei Wu, Guo-Zhang Huang, Yang Liu, Si-Guo Wu,  
Zhao-Ping Ni\* and Ming-Liang Tong

Key Laboratory of Bioinorganic and Synthetic Chemistry of Ministry of Education,  
School of Chemistry, Sun Yat-Sen University, Guangzhou, 510275, P. R. China

## Contents

**Table S1.** Crystallographic data for **1·dpt·2.5H<sub>2</sub>O**.

**Table S2.** Crystallographic data for **1·dpt·1.5H<sub>2</sub>O**.

**Table S3.** Selected structural parameters for **1·dpt·2.5H<sub>2</sub>O** at different temperatures.

**Table S4.** Selected structural parameters for **1·dpt·1.5H<sub>2</sub>O** at different temperatures.

**Table S5.**  $\pi \cdots \pi$  interactions in **1·dpt·2.5H<sub>2</sub>O** at different temperatures.

**Table S6.**  $\pi \cdots \pi$  interactions in **1·dpt·1.5H<sub>2</sub>O** at different temperatures.

**Table S7.** Hydrogen-bonding interactions in **1·dpt·2.5H<sub>2</sub>O** at different temperatures.

**Table S8.** Hydrogen-bonding interactions in **1·dpt·1.5H<sub>2</sub>O** at different temperatures.

**Figure S1.** Powder X-ray diffraction data for **1·dpt·2.5H<sub>2</sub>O**, **1·dpt·1.5H<sub>2</sub>O** and **1·dpt** at room temperature.

**Figure S2.** The FT-IR spectra of **1·dpt·2.5H<sub>2</sub>O**, **1·dpt·1.5H<sub>2</sub>O** and **1·dpt**.

**Figure S3.** Thermogravimetric analyses of **1·dpt·2.5H<sub>2</sub>O**, **1·dpt·1.5H<sub>2</sub>O** and **1·dpt**.

**Figure S4.** The DSC curve at 10 K·min<sup>-1</sup> for **1·dpt·1.5H<sub>2</sub>O**.

**Figure S5.** Magnetic data for **1·dpt·2.5H<sub>2</sub>O** and **1·dpt·1.5H<sub>2</sub>O** at 2 K min<sup>-1</sup> and for **1·dpt** in settle mode.

**Figure S6.** Magnetic data with two consecutive cycles for **1·dpt·2.5H<sub>2</sub>O**, **1·dpt·1.5H<sub>2</sub>O** and **1·dpt** at 2 K min<sup>-1</sup>.

**Figure S7.** Magnetic data for the water re-adsorption phase **1·dpt·2.5H<sub>2</sub>O**.

**Figure S8.** Asymmetric unit of **1·dpt·2.5H<sub>2</sub>O** at 150 K.

**Figure S9.** Structure representations along the *a*-axis in **1·dpt·2.5H<sub>2</sub>O** at 150 K.

**Figure S10.**  $\pi \cdots \pi$  interactions in **1·dpt·2.5H<sub>2</sub>O** at 150 K along the *c* axis.

**Figure S11.** Hydrogen-bonding interactions in **1·dpt·2.5H<sub>2</sub>O**.

**Figure S12.** The voids along the *a*-axis in **1·dpt·2.5H<sub>2</sub>O** at 150 K.

**Figure S13.** The uncoordinated dpt ligands and H<sub>2</sub>O in the 1D channels along the *b*-axis in **1·dpt·2.5H<sub>2</sub>O** at 150 K.

**Figure S14.** 1D channels along the *a*- and *b*-axes for **1·dpt·2.5H<sub>2</sub>O** at 150 K after removing the uncoordinated dpt ligands and H<sub>2</sub>O.

**Figure S15.** The structural overlap for the asymmetric units of **1·dpt·2.5H<sub>2</sub>O** and **1·dpt·1.5H<sub>2</sub>O** at 80 K.

**Table S1.** Crystallographic data for **1·dpt·2.5H<sub>2</sub>O**.

| Parameter                                            | 1·dpt·2.5H <sub>2</sub> O                                                                                       |                                                                                                                 |                                                                                                                 |
|------------------------------------------------------|-----------------------------------------------------------------------------------------------------------------|-----------------------------------------------------------------------------------------------------------------|-----------------------------------------------------------------------------------------------------------------|
| <i>T</i> /K                                          | 80(2)                                                                                                           | 150(2)                                                                                                          | 298(2)                                                                                                          |
| Chemical Formula                                     | C <sub>64</sub> H <sub>41</sub> Fe <sub>2</sub> N <sub>16</sub> O <sub>0.5</sub> Pt <sub>2</sub> S <sub>4</sub> | C <sub>64</sub> H <sub>41</sub> Fe <sub>2</sub> N <sub>16</sub> O <sub>0.5</sub> Pt <sub>2</sub> S <sub>4</sub> | C <sub>64</sub> H <sub>41</sub> Fe <sub>2</sub> N <sub>16</sub> O <sub>0.5</sub> Pt <sub>2</sub> S <sub>4</sub> |
| <i>Mr</i>                                            | 1672.25                                                                                                         | 1672.25                                                                                                         | 1672.25                                                                                                         |
| Crystal system                                       | monoclinic                                                                                                      | monoclinic                                                                                                      | monoclinic                                                                                                      |
| Space group                                          | <i>P</i> 2 <sub>1</sub> / <i>C</i>                                                                              | <i>P</i> 2 <sub>1</sub> / <i>C</i>                                                                              | <i>P</i> 2 <sub>1</sub> / <i>C</i>                                                                              |
| <i>a</i> /Å                                          | 7.1865(2)                                                                                                       | 7.2691(3)                                                                                                       | 7.4493(3)                                                                                                       |
| <i>b</i> /Å                                          | 28.8122(8)                                                                                                      | 28.9451(10)                                                                                                     | 29.2894(10)                                                                                                     |
| <i>c</i> /Å                                          | 29.7515(9)                                                                                                      | 29.9141(12)                                                                                                     | 30.2310(11)                                                                                                     |
| <i>α</i> /°                                          | 90                                                                                                              | 90                                                                                                              | 90                                                                                                              |
| <i>β</i> /°                                          | 94.6390(10)                                                                                                     | 94.9550(10)                                                                                                     | 94.5640(10)                                                                                                     |
| <i>γ</i> /°                                          | 90                                                                                                              | 90                                                                                                              | 90                                                                                                              |
| <i>V</i> /Å <sup>3</sup>                             | 6140.1(3)                                                                                                       | 6270.5(4)                                                                                                       | 6575.1(4)                                                                                                       |
| <i>Z</i>                                             | 4                                                                                                               | 4                                                                                                               | 4                                                                                                               |
| <i>μ</i> (Mo Kα)/mm <sup>-1</sup>                    | 5.199                                                                                                           | 5.090                                                                                                           | 4.855                                                                                                           |
| Radiation                                            | Mo Kα (λ = 0.71073)                                                                                             | Mo Kα (λ = 0.71073)                                                                                             | Mo Kα (λ = 0.71073)                                                                                             |
| Reflections collected                                | 65816                                                                                                           | 128886                                                                                                          | 57550                                                                                                           |
| Independent reflections                              | 14067 [ <i>R</i> <sub>int</sub> = 0.0514]                                                                       | 14424 [ <i>R</i> <sub>int</sub> = 0.0578]                                                                       | 15070 [ <i>R</i> <sub>int</sub> = 0.0279]                                                                       |
| Goodness-of-fit on <i>F</i> <sup>2</sup>             | 1.256                                                                                                           | 1.135                                                                                                           | 1.076                                                                                                           |
| Final <i>R</i> indexes [ <i>I</i> ≥ 2σ ( <i>I</i> )] | <i>R</i> <sub>1</sub> <sup>a</sup> = 0.0747, <i>wR</i> <sub>2</sub> = 0.1452                                    | <i>R</i> <sub>1</sub> = 0.0469, <i>wR</i> <sub>2</sub> = 0.0985                                                 | <i>R</i> <sub>1</sub> = 0.0306, <i>wR</i> <sub>2</sub> = 0.0634                                                 |
| Final <i>R</i> indexes [all data]                    | <i>R</i> <sub>1</sub> = 0.0885, <i>wR</i> <sub>2</sub> <sup>b</sup> = 0.1497                                    | <i>R</i> <sub>1</sub> = 0.0548, <i>wR</i> <sub>2</sub> = 0.1010                                                 | <i>R</i> <sub>1</sub> = 0.0424, <i>wR</i> <sub>2</sub> = 0.0668                                                 |
| Largest diff. peak/hole / e Å <sup>-3</sup>          | 2.70/-3.18                                                                                                      | 2.66/-2.17                                                                                                      | 1.86/-1.39                                                                                                      |
| CCDC                                                 | 2088653                                                                                                         | 2088655                                                                                                         | 2088654                                                                                                         |

$$^a R_1 = \frac{\sum |F_o| - |F_c|}{\sum |F_o|}; ^b wR_2 = \left\{ \frac{\sum w(F_o^2 - F_c^2)^2}{\sum [w(F_o^2)^2]} \right\}^{1/2}.$$

**Table S2.** Crystallographic data for **1·dpt·1.5H<sub>2</sub>O**.

| Parameter                                            | 1·dpt·1.5H <sub>2</sub> O                                                                                       |                                                                                                                 |                                                                                                                 |
|------------------------------------------------------|-----------------------------------------------------------------------------------------------------------------|-----------------------------------------------------------------------------------------------------------------|-----------------------------------------------------------------------------------------------------------------|
|                                                      |                                                                                                                 |                                                                                                                 |                                                                                                                 |
| <i>T</i> /K                                          | 80(2)                                                                                                           | 180(2)                                                                                                          | 298(2)                                                                                                          |
| Chemical Formula                                     | C <sub>64</sub> H <sub>41</sub> Fe <sub>2</sub> N <sub>16</sub> O <sub>0.5</sub> Pt <sub>2</sub> S <sub>4</sub> | C <sub>64</sub> H <sub>41</sub> Fe <sub>2</sub> N <sub>16</sub> O <sub>0.5</sub> Pt <sub>2</sub> S <sub>4</sub> | C <sub>64</sub> H <sub>41</sub> Fe <sub>2</sub> N <sub>16</sub> O <sub>0.5</sub> Pt <sub>2</sub> S <sub>4</sub> |
| <i>Mr</i>                                            | 1672.25                                                                                                         | 1672.25                                                                                                         | 1672.25                                                                                                         |
| Crystal system                                       | monoclinic                                                                                                      | monoclinic                                                                                                      | monoclinic                                                                                                      |
| Space group                                          | <i>P</i> 2 <sub>1</sub> / <i>C</i>                                                                              | <i>P</i> 2 <sub>1</sub> / <i>C</i>                                                                              | <i>P</i> 2 <sub>1</sub> / <i>C</i>                                                                              |
| <i>a</i> /Å                                          | 7.1406(3)                                                                                                       | 7.2864(4)                                                                                                       | 7.4466(7)                                                                                                       |
| <i>b</i> /Å                                          | 28.6586(10)                                                                                                     | 28.9521(15)                                                                                                     | 29.242(3)                                                                                                       |
| <i>c</i> /Å                                          | 29.6734(11)                                                                                                     | 29.9614(15)                                                                                                     | 30.236(3)                                                                                                       |
| <i>α</i> /°                                          | 90                                                                                                              | 90                                                                                                              | 90                                                                                                              |
| <i>β</i> /°                                          | 94.8413(13)                                                                                                     | 95.435(2)                                                                                                       | 95.000(3)                                                                                                       |
| <i>γ</i> /°                                          | 90                                                                                                              | 90                                                                                                              | 90                                                                                                              |
| <i>V</i> /Å <sup>3</sup>                             | 6050.7(4)                                                                                                       | 6292.1(6)                                                                                                       | 6559.1(10)                                                                                                      |
| <i>Z</i>                                             | 4                                                                                                               | 4                                                                                                               | 4                                                                                                               |
| <i>μ</i> (Mo Kα)/mm <sup>-1</sup>                    | 5.275                                                                                                           | 5.073                                                                                                           | 4.867                                                                                                           |
| Radiation                                            | Mo Kα (λ = 0.71073)                                                                                             | Mo Kα (λ = 0.71073)                                                                                             | Mo Kα (λ = 0.71073)                                                                                             |
| Reflections collected                                | 45352                                                                                                           | 116856                                                                                                          | 114467                                                                                                          |
| Independent reflections                              | 12339 [ <i>R</i> <sub>int</sub> = 0.0592]                                                                       | 12831 [ <i>R</i> <sub>int</sub> = 0.0654]                                                                       | 13384 [ <i>R</i> <sub>int</sub> = 0.0776]                                                                       |
| Goodness-of-fit on <i>F</i> <sup>2</sup>             | 1.076                                                                                                           | 1.115                                                                                                           | 1.237                                                                                                           |
| Final <i>R</i> indexes [ <i>I</i> ≥ 2σ ( <i>I</i> )] | <i>R</i> <sub>1</sub> <sup>a</sup> = 0.0409, <i>wR</i> <sub>2</sub> = 0.0953                                    | <i>R</i> <sub>1</sub> = 0.0411, <i>wR</i> <sub>2</sub> = 0.0900                                                 | <i>R</i> <sub>1</sub> = 0.0582, <i>wR</i> <sub>2</sub> = 0.1101                                                 |
| Final <i>R</i> indexes [all data]                    | <i>R</i> <sub>1</sub> = 0.0634, <i>wR</i> <sub>2</sub> <sup>b</sup> = 0.1030                                    | <i>R</i> <sub>1</sub> = 0.0519, <i>wR</i> <sub>2</sub> = 0.0941                                                 | <i>R</i> <sub>1</sub> = 0.0721, <i>wR</i> <sub>2</sub> = 0.1140                                                 |
| Largest diff. peak/hole / e Å <sup>-3</sup>          | 2.20/-1.24                                                                                                      | 2.04/-1.67                                                                                                      | 1.73/-2.60                                                                                                      |
| CCDC                                                 | 2088656                                                                                                         | 2088657                                                                                                         | 2088658                                                                                                         |

$$^a R_1 = \frac{\sum |F_o| - |F_c|}{\sum |F_o|}; \quad ^b wR_2 = \left\{ \frac{\sum w(F_o^2 - F_c^2)^2}{\sum [w(F_o^2)]} \right\}^{1/2}.$$

**Table S3.** Selected structural parameters for **1·dpt·2.5H<sub>2</sub>O** at different temperatures.

| Parameter                                       | 80(2)                  | 150(2)                 | 298(2)                 |
|-------------------------------------------------|------------------------|------------------------|------------------------|
| <Fe-N> <sup>a</sup>                             | <Fe1-N> 1.966(9)       | <Fe1-N> 1.961(5)       | <Fe1-N> 2.171(3)       |
|                                                 | <Fe2-N> 2.053(9)       | <Fe2-N> 2.167(5)       | <Fe2-N> 2.172(3)       |
| Fe···Fe <sup>b</sup>                            | 14.9491(20)            | 15.0284(14)            | 15.1875(10)            |
|                                                 | 14.8031(20)            | 14.8885(14)            | 15.0451(10)            |
| Fe···Fe <sup>c</sup>                            | 10.1414(19)            | 10.2386(12)            | 10.5071(8)             |
|                                                 | 10.2136(19)            | 10.3240(12)            | 10.4318(8)             |
|                                                 | 10.1673(19)            | 10.2298(12)            | 10.4322(8)             |
|                                                 | 10.2518(19)            | 10.3387(12)            | 10.5166(8)             |
| ΣFe <sup>d</sup>                                | ΣFe1 11.4(3)           | ΣFe1 11.7(2)           | ΣFe1 15.49(14)         |
|                                                 | ΣFe2 17.8(3)           | ΣFe2 26.8(2)           | ΣFe2 19.16(14)         |
| Fe-N≡C <sup>e</sup>                             | Fe1-N≡C 175.6(8)       | Fe1-N≡C 175.6(5)       | Fe1-N≡C 172.9(4)       |
|                                                 | Fe2-N≡C 169.5(8)       | Fe2-N≡C 166.8(5)       | Fe2-N≡C 166.5(4)       |
| θ <sup>f</sup>                                  | 89.593(22)             | 89.393(13)             | 89.539(9)              |
|                                                 | 89.526(22)             | 89.524(13)             | 89.587(9)              |
| dihedral angle <sup>g</sup>                     | Fe1S1:9.378(388)/10.4  | Fe1S1:9.919(302)/8.94  | Fe1S1:7.235(525)/9.90  |
|                                                 | 10(728); 10.854(323)   | 7(683); 11.262(256)    | 7(593); 10.556(171)    |
|                                                 | Fe2S2:6.701(384)/7.31  | Fe2S2:5.316(218)/6.91  | Fe2S2:3.731(208)/6.86  |
|                                                 | 1(385); 3.414(284)     | 3(269); 4.233(199)     | 5(216); 3.988(172)     |
| dihedral angle <sup>h</sup>                     | Fe1:10.210(307)        | Fe1:9.372(235)         | Fe1:12.868(179)        |
|                                                 | Fe2:13.579(394)        | Fe2:15.375(262)        | Fe2:14.348(212)        |
| dihedral angle <sup>i</sup>                     | S4:17.438(518)/17.742( | S4:17.692(410)/17.272( | S4:16.177(256)/17.926( |
|                                                 | 749); 11.352(349)      | 465); 10.753(260)      | 463); 11.750(266)      |
|                                                 | S3:16.650(755)/23.605( | S3:16.062(664)/21.810( | S3:15.639(661)/22.752( |
|                                                 | 552); 13.129(391)      | 451); 12.789(326)      | 497); 13.407(232)      |
| θ(N5-dpt1 <sup>center</sup> -N6) <sup>j</sup>   | 155.827(110)           | 155.451(76)            | 154.402(48)            |
| θ(N11-dpt2 <sup>center</sup> -N12) <sup>k</sup> | 153.384(130)           | 152.375(78)            | 151.527(51)            |

<sup>a</sup> The average Fe-N bond lengths(Å); <sup>b</sup> The Fe···Fe distance(Å) linked by dpt; <sup>c</sup> The Fe···Fe distance(Å) linked by [Pt(CN)<sub>4</sub>]<sup>2-</sup>; <sup>d</sup> Octahedral distortion parameters (°); <sup>e</sup> Average Fe-N≡C angles within Hofmann layer; <sup>f</sup> The acute angle between neighboring Fe(II) sites within the Hofmann layer; <sup>g</sup> In the ligand dpt, the dihedral angles between thiadiazole and each pyridine ring as well as the dihedral angle between the pyridine rings; <sup>h</sup> The dihedral angle between the up and down pyridine rings coordinated to Fe(II) site. <sup>i</sup> The dihedral angle between the pyridine rings in the unoccupied ligand dpt. <sup>j</sup> The angle for N5-dpt1<sup>center</sup>-N6. <sup>k</sup> The angle for N11-dpt2<sup>center</sup>-N12.

**Table S4.** Selected structural parameters for **1·dpt·1.5H<sub>2</sub>O** at different temperatures.

| Parameter                                           | 80(2)                                         | 180(2)                                        | 298(2)                                       |
|-----------------------------------------------------|-----------------------------------------------|-----------------------------------------------|----------------------------------------------|
| <Fe-N> <sup>a</sup>                                 | <Fe1-N> 1.964(5)                              | <Fe1-N> 1.962(5)                              | <Fe1-N> 2.167(7)                             |
|                                                     | <Fe2-N> 1.964(5)                              | <Fe2-N> 2.169(5)                              | <Fe2-N> 2.170(8)                             |
| Fe...Fe <sup>b</sup>                                | 14.8787(14)                                   | 15.0440(15)                                   | 15.1912(23)                                  |
|                                                     | 14.7948(14)                                   | 14.9190(15)                                   | 15.0472(23)                                  |
| Fe...Fe <sup>c</sup>                                | 10.1030(12)                                   | 10.2579(12)                                   | 10.4238(18)                                  |
|                                                     | 10.1487(12)                                   | 10.3401(12)                                   | 10.5164(18)                                  |
|                                                     | 10.0903(13)                                   | 10.2321(12)                                   | 10.5072(18)                                  |
|                                                     | 10.1731(12)                                   | 10.3458(12)                                   | 10.4111(18)                                  |
| ΣFe <sup>d</sup>                                    | ΣFe1 9.8 (2)                                  | ΣFe1 10.8(2)                                  | ΣFe1 15.4 (3)                                |
|                                                     | ΣFe2 14.4(2)                                  | ΣFe2 23.19(2)                                 | ΣFe2 19.2(3)                                 |
| Fe-N≡C <sup>e</sup>                                 | Fe1-N≡C 175.8(5)                              | Fe1-N≡C 175.7(5)                              | Fe1-N≡C 172.6(8)                             |
|                                                     | Fe2-N≡C 172.0(5)                              | Fe2-N≡C 167.2(5)                              | Fe2-N≡C 166.1(8)                             |
| θ <sup>f</sup>                                      | 89.532(14)                                    | 89.367(13)                                    | 89.473(18)                                   |
|                                                     | 89.741(14)                                    | 89.543(13)                                    | 89.493(18)                                   |
| dihedral angle <sup>g</sup>                         | Fe1S1:9.384(329)/11.4<br>56(324); 10.842(215) | Fe1S1:10.147(285)/9.2<br>81(536); 11.542(227) | Fe1S1:7.009(601)/9.93<br>9(656); 10.612(313) |
|                                                     | Fe2S2:7.131(236)/8.13<br>8(243); 2.427(207)   | Fe2S2:5.772(202)/6.42<br>9(240); 3.473(204)   | Fe2S2:4.718(360)/7.28<br>6(635); 4.024(340)  |
|                                                     |                                               |                                               |                                              |
| dihedral angle <sup>h</sup>                         | Fe1:9.933(234)                                | Fe1:9.219(218)                                | Fe1:12.959(358)                              |
|                                                     | Fe2:11.857(240)                               | Fe2:14.940(268)                               | Fe2:14.256(386)                              |
| dihedral angle <sup>i</sup>                         | S4:18.161(244)/18.767<br>(284); 13.481(245)   | S4:18.058(304)/17.363<br>(382); 11.014(274)   | S4:17.576(416)/18.405<br>(588); 12.308(416)  |
|                                                     | S3:16.471(758)/23.044<br>(517); 14.549(256)   | S3:16.604(793)/22.224<br>(536); 14.048(293)   | S3:15.612(524)/22.373<br>(491); 13.389(417)  |
|                                                     |                                               |                                               |                                              |
| θ(N5-dpt1 <sup>center</sup> -<br>N6) <sup>j</sup>   | 156.399(71)                                   | 155.590(76)                                   | 154.653(88)                                  |
| θ(N11-dpt2 <sup>center</sup> -<br>N12) <sup>k</sup> | 154.670(71)                                   | 153.094(78)                                   | 152.275(132)                                 |

<sup>a</sup> The average Fe-N bond lengths(Å); <sup>b</sup> The Fe...Fe distance(Å) linked by dpt; <sup>c</sup> The Fe...Fe distance(Å) linked by [Pt(CN)<sub>4</sub>]<sup>2-</sup>; <sup>d</sup> Octahedral distortion parameters (°); <sup>e</sup> Average Fe-N≡C angles within Hofmann layer; <sup>f</sup> The acute angle between neighboring Fe(II) sites within the Hofmann layer; <sup>g</sup> In the ligand dpt, the dihedral angles between thiadiazole and each pyridine ring as well as the dihedral angle between the pyridine rings; <sup>h</sup> The dihedral angle between the up and down pyridine rings coordinated to Fe(II) site. <sup>i</sup> The dihedral angles between thiadiazole and each pyridine ring as well as the dihedral angle between the pyridine rings in the unoccupied ligand dpt. <sup>j</sup> The angle for N5-dpt1<sup>center</sup>-N6. <sup>k</sup> The angle for N11-dpt2<sup>center</sup>-N12.

**Table S5.**  $\pi \cdots \pi$  interactions in **1·dpt·2.5H<sub>2</sub>O** at different temperatures.

| <b>80 K</b>                             | $\theta^{[1]}$ | $Z^{[2]}$ | $d^{[3]}$ | $r^{[4]}$ |
|-----------------------------------------|----------------|-----------|-----------|-----------|
| py1 <sup>a</sup> and py2 <sup>b</sup>   | 11.411(397)    | 3.7334(1) | 3.5973    | 0.9989    |
| py2 <sup>b</sup> and py3 <sup>c</sup>   | 11.411(397)    | 3.6324(1) | 3.3323    | 1.4457    |
| py5 <sup>e</sup> and py6 <sup>f</sup>   | 5.289(370)     | 3.4533(1) | 3.3798    | 0.5022    |
| py7 <sup>g</sup> and py8 <sup>h</sup>   | 5.681(357)     | 3.7216(1) | 3.6477    | 0.7380    |
| py8 <sup>h</sup> and py9 <sup>i</sup>   | 5.681(357)     | 3.7118(1) | 3.3914    | 1.5086    |
| py11 <sup>k</sup> and py12 <sup>l</sup> | 6.317(330)     | 3.7206(1) | 3.6574    | 0.6828    |
| <b>150 K</b>                            | $\theta^{[1]}$ | $Z^{[2]}$ | $d^{[3]}$ | $r^{[4]}$ |
| py1 <sup>a</sup> and py2 <sup>b</sup>   | 12.06(52)      | 3.7501(2) | 3.6334    | 0.9282    |
| py2 <sup>b</sup> and py3 <sup>c</sup>   | 12.060(396)    | 3.6872(1) | 3.3621    | 1.5138    |
| py5 <sup>e</sup> and py6 <sup>f</sup>   | 6.017(303)     | 3.4956(1) | 3.4319    | 0.6642    |
| py7 <sup>g</sup> and py8 <sup>h</sup>   | 4.873(641)     | 3.7686(1) | 3.6871    | 0.7795    |
| py8 <sup>h</sup> and py9 <sup>i</sup>   | 4.872(414)     | 3.7330(1) | 3.4386    | 1.4530    |
| py11 <sup>k</sup> and py12 <sup>l</sup> | 6.828(261)     | 3.7656(1) | 3.7018    | 0.6902    |
| <b>298 K</b>                            | $\theta^{[1]}$ | $Z^{[2]}$ | $d^{[3]}$ | $r^{[4]}$ |
| py1 <sup>a</sup> and py2 <sup>b</sup>   | 10.464(184)    | 3.7826(2) | 3.6738    | 0.9007    |
| py2 <sup>b</sup> and py3 <sup>c</sup>   | 10.464(184)    | 3.7508(1) | 3.5315    | 1.2637    |
| py5 <sup>e</sup> and py6 <sup>f</sup>   | 6.510(214)     | 3.6163(1) | 3.5564    | 0.6555    |
| py7 <sup>g</sup> and py8 <sup>h</sup>   | 4.236(224)     | 3.8469(1) | 3.7562    | 0.8304    |
| py8 <sup>h</sup> and py9 <sup>i</sup>   | 4.236(224)     | 3.8638(1) | 3.5605    | 1.5006    |
| py11 <sup>k</sup> and py12 <sup>l</sup> | 5.814(250)     | 3.8144(1) | 3.7683    | 0.5912    |

<sup>a</sup>py1: C5-C9, N5, x, y, z; <sup>b</sup>py2: C60-C64, N16, 1-x, 1/2+y, 1/2-z; <sup>c</sup>py3: C5'-C9', N5', 1+x, y, z; <sup>e</sup>py5: C37-C41, N13, x, 3/2-y, 1/2+z; <sup>f</sup>py6: C14'-C18', N6', 1+x, y, z; <sup>g</sup>py7: C32-C36, N12, x, 3/2-y, 1/2+z; <sup>h</sup>py8: C51-C55, N15, 1-x, 1/2+y, 1/2-z; <sup>i</sup>py9: C32'-C36', N12', 1+x, 3/2-y, 1/2+z; <sup>k</sup>py11: C46-C50, N14, x, 3/2-y, 1/2+z; <sup>l</sup>py12: C23'-C27', N11', 1+x, 3/2-y, 1/2+z.

[<sup>1</sup>] The dihedral angle between two aromatic rings (°); [<sup>2</sup>] The distance between the centroids of aromatic rings (Å); [<sup>3</sup>] The perpendicular distance between two aromatic rings (Å); [<sup>4</sup>] The offset distance between two aromatic rings (Å).

**Table S6.**  $\pi \cdots \pi$  interactions in **1·dpt·1.5H<sub>2</sub>O** at different temperatures.

| <b>80 K</b>                             | $\theta^{[1]}$ | $Z^{[2]}$ | $d^{[3]}$ | $r^{[4]}$ |
|-----------------------------------------|----------------|-----------|-----------|-----------|
| py1 <sup>a</sup> and py2 <sup>b</sup>   | 11.676(244)    | 3.7225(2) | 3.5601    | 1.0875    |
| py2 <sup>b</sup> and py3 <sup>c</sup>   | 11.676(244)    | 3.5937(1) | 3.2932    | 1.4386    |
| py5 <sup>e</sup> and py6 <sup>f</sup>   | 5.515(229)     | 3.4269(1) | 3.3456    | 0.7420    |
| py7 <sup>g</sup> and py8 <sup>h</sup>   | 6.106(239)     | 3.7009(1) | 3.6220    | 0.7601    |
| py8 <sup>h</sup> and py9 <sup>i</sup>   | 6.106(239)     | 3.6915(1) | 3.3629    | 1.5225    |
| py11 <sup>k</sup> and py12 <sup>l</sup> | 6.217(246)     | 3.6582(1) | 3.6224    | 0.5105    |
| <b>180 K</b>                            | $\theta^{[1]}$ | $Z^{[2]}$ | $d^{[3]}$ | $r^{[4]}$ |
| py1 <sup>a</sup> and py2 <sup>b</sup>   | 12.754(291)    | 3.7570(2) | 3.6314    | 0.9633    |
| py2 <sup>b</sup> and py3 <sup>c</sup>   | 12.754(291)    | 3.6904(2) | 3.3419    | 1.5655    |
| py5 <sup>e</sup> and py6 <sup>f</sup>   | 5.262(251)     | 3.4869(2) | 3.4279    | 0.6387    |
| py7 <sup>g</sup> and py8 <sup>h</sup>   | 5.282(250)     | 3.7655(2) | 3.6851    | 0.7740    |
| py8 <sup>h</sup> and py9 <sup>i</sup>   | 5.282(250)     | 3.7260(2) | 3.4267    | 1.4631    |
| py11 <sup>k</sup> and py12 <sup>l</sup> | 6.410(255)     | 3.7446(2) | 3.6997    | 0.5781    |
| <b>298 K</b>                            | $\theta^{[1]}$ | $Z^{[2]}$ | $d^{[3]}$ | $r^{[4]}$ |
| py1 <sup>a</sup> and py2 <sup>b</sup>   | 10.907(362)    | 3.7759(4) | 3.6542    | 0.9509    |
| py2 <sup>b</sup> and py3 <sup>c</sup>   | 10.907(362)    | 3.7449(3) | 3.5105    | 1.3041    |
| py5 <sup>e</sup> and py6 <sup>f</sup>   | 6.220(323)     | 3.5966(3) | 3.5401    | 0.6350    |
| py7 <sup>g</sup> and py8 <sup>h</sup>   | 4.754(386)     | 3.8391(3) | 3.7512    | 0.8168    |
| py8 <sup>h</sup> and py9 <sup>i</sup>   | 4.754(386)     | 3.8616(3) | 3.5483    | 1.5237    |
| py11 <sup>k</sup> and py12 <sup>l</sup> | 6.298(396)     | 3.8020(3) | 3.7645    | 0.5327    |

<sup>a</sup>py1: C5-C9, N5, x, y, z; <sup>b</sup>py2: C60-C64, N16, 1-x, 1/2+y, 1/2-z; <sup>c</sup>py3: C5'-C9', N5', 1+x, y, z; <sup>e</sup>py5: C37-C41, N13, x, 3/2-y, 1/2+z; <sup>f</sup>py6: C14'-C18', N6', 1+x, y, z; <sup>g</sup>py7: C32-C36, N12, x, 3/2-y, 1/2+z; <sup>h</sup>py8: C51-C55, N15, 1-x, 1/2+y, 1/2-z; <sup>i</sup>py9: C32'-C36', N12', 1+x, 3/2-y, 1/2+z; <sup>k</sup>py11: C46-C50, N14, x, 3/2-y, 1/2+z; <sup>l</sup>py12: C23'-C27', N11', 1+x, 3/2-y, 1/2+z.

[<sup>1</sup>] The dihedral angle between two aromatic rings (°); [<sup>2</sup>] The distance between the centroids of aromatic rings (Å); [<sup>3</sup>] The perpendicular distance between two aromatic rings (Å); [<sup>4</sup>] The offset distance between two aromatic rings (Å).



**Table S7.** Hydrogen-bonding interactions in **1·dpt·2.5H<sub>2</sub>O** at different temperatures.

| <i>T</i> | I <sup>[1]</sup>          |          |        | II <sup>[2]</sup>          |          |        | III <sup>[3]</sup> |          |        |
|----------|---------------------------|----------|--------|----------------------------|----------|--------|--------------------|----------|--------|
|          | D-H···A                   | d(D···A) | <(DHA) | D-H···A                    | d(D···A) | <(DHA) | D-H···A            | d(D···A) | <(DHA) |
| 80 K     |                           |          |        | C8-H8...N13 <sup>a</sup>   | 3.403    | 152.37 | O1-H1B...N14       | 2.853    | 170.13 |
|          |                           |          |        | C11-H11...N13 <sup>b</sup> | 3.587    | 165.67 | O1-H1A...N15       | 2.857    | 171.19 |
| 150 K    | C17-H17...N9 <sup>c</sup> | 3.146    | 111.95 | C8-H8...N13                | 3.415    | 152.75 | O1-H1B...N14       | 2.869    | 168.62 |
|          |                           |          |        | C11-H11...N13              | 3.594    | 165.68 | O1-H1A...N15       | 2.862    | 168.89 |
| 298 K    |                           |          |        | C8-H8...N13                | 3.445    | 156.73 | O1-H1B...N14       | 2.985    | 165.81 |
|          |                           |          |        |                            |          |        | O1-H1A...N15       | 2.963    | 165.18 |

<sup>[1]</sup> Hydrogen-bonding interactions between host and host; <sup>[2]</sup> Hydrogen-bonding interactions between host and guests. <sup>[3]</sup> Hydrogen-bonding interactions between guests. Symmetry code: a) 1-x, -1/2+y, 1/2-z; b) 1-x, -1/2+y, 1/2-z; c) 1-x, 1-y, 1-z.

**Table S8.** Hydrogen-bonding interactions in **1·dpt·1.5H<sub>2</sub>O** at different temperatures.

| <i>T</i> | I <sup>[1]</sup>          |          |        | II <sup>[2]</sup>          |          |        | III <sup>[3]</sup> |          |        |
|----------|---------------------------|----------|--------|----------------------------|----------|--------|--------------------|----------|--------|
|          | D-H···A                   | d(D···A) | <(DHA) | D-H···A                    | d(D···A) | <(DHA) | D-H···A            | d(D···A) | <(DHA) |
| 80 K     |                           |          |        | C8-H8...N13 <sup>a</sup>   | 3.395    | 152.13 | O1-H1B...N14       | 2.957    | 173.29 |
|          |                           |          |        | C11-H11...N13 <sup>b</sup> | 3.611    | 166.19 | O1-H1A...N15       | 2.887    | 175.87 |
| 180 K    | C17-H17...N9 <sup>c</sup> | 3.136    | 112.45 | C8-H8...N13                | 3.426    | 152.54 | O1-H1B...N14       | 2.929    | 173.11 |
|          |                           |          |        |                            |          |        | O1-H1A...N15       | 2.899    | 171.13 |
| 298 K    | C7-H7...N7                | 3.208    | 114.20 | C8-H8...N13                | 3.431    | 156.24 | O1-H1B...N14       | 2.999    | 169.59 |
|          |                           |          |        |                            |          |        | O1-H1A...N15       | 2.930    | 168.00 |

<sup>[1]</sup> Hydrogen-bonding interactions between host and host; <sup>[2]</sup> Hydrogen-bonding interactions between host and guests. <sup>[3]</sup> Hydrogen-bonding interactions between guests. Symmetry code: a) 1-x, -1/2+y, 1/2-z; b) 1-x, -1/2+y, 1/2-z; c) 1-x, 1-y, 1-z.

(a)

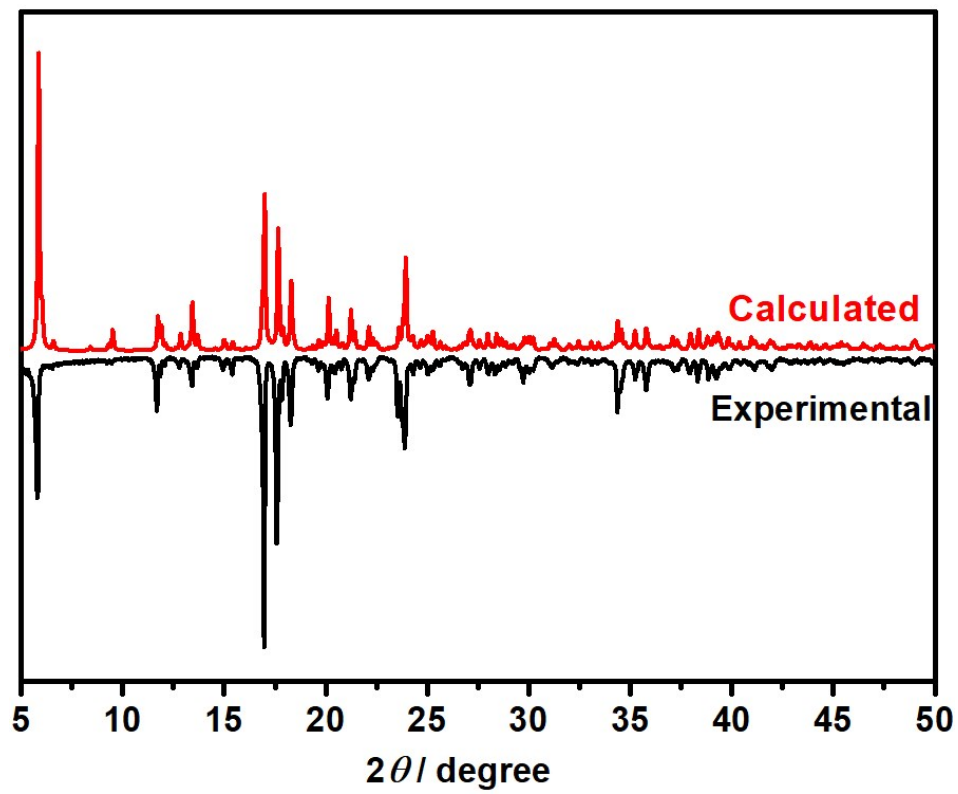

(b)

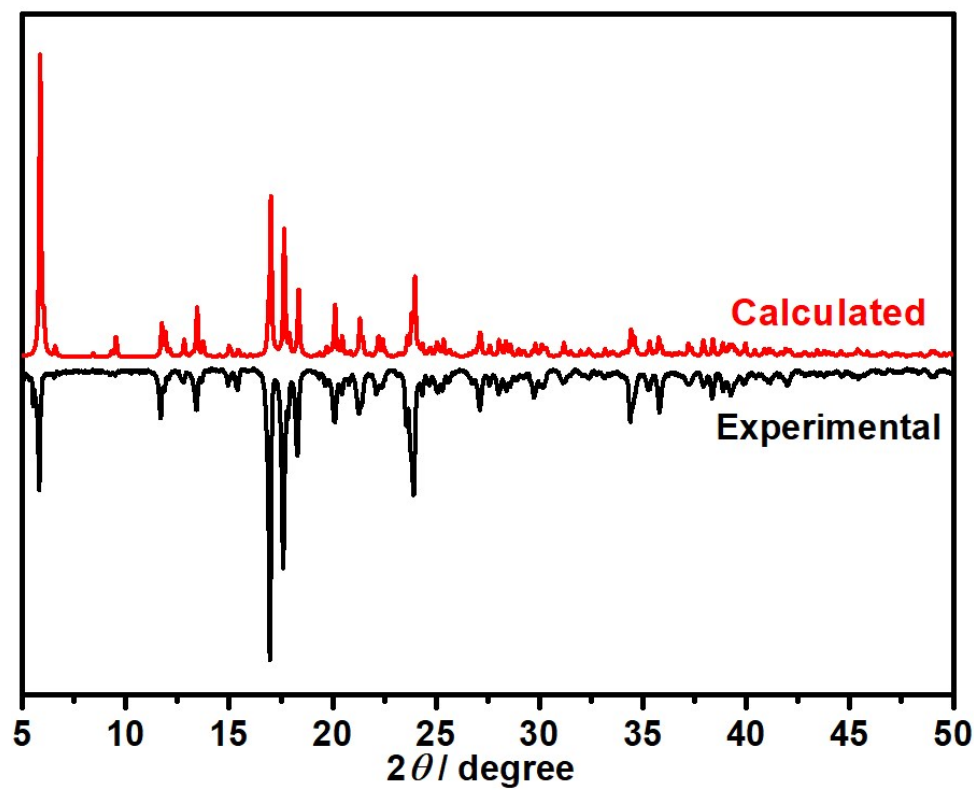

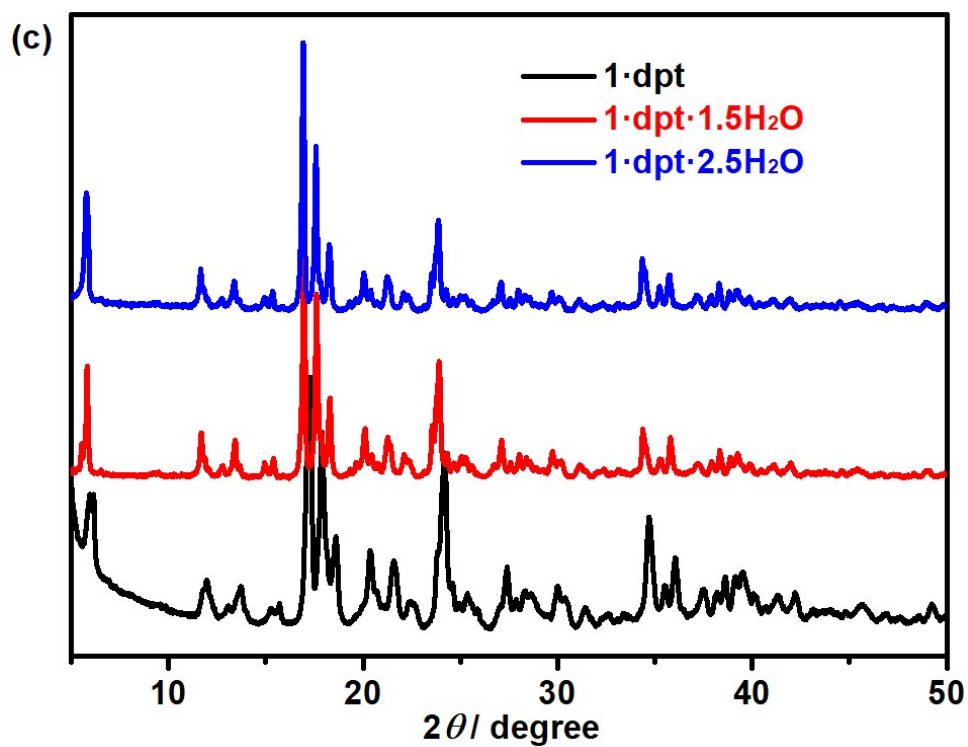

**Figure S1.** Powder X-ray diffraction data for **1·dpt·2.5H<sub>2</sub>O** (a) and **1·dpt·1.5H<sub>2</sub>O** (b) at room temperature. (c) The experimental PXRD patterns for **1·dpt·2.5H<sub>2</sub>O**, **1·dpt·1.5H<sub>2</sub>O** and **1·dpt** at room temperature. The fully dehydrated phase **1·dpt** was obtained by heating the old samples of **1·dpt·1.5H<sub>2</sub>O** (aged about half a year) at 107 °C for 2.5 h.

(a)

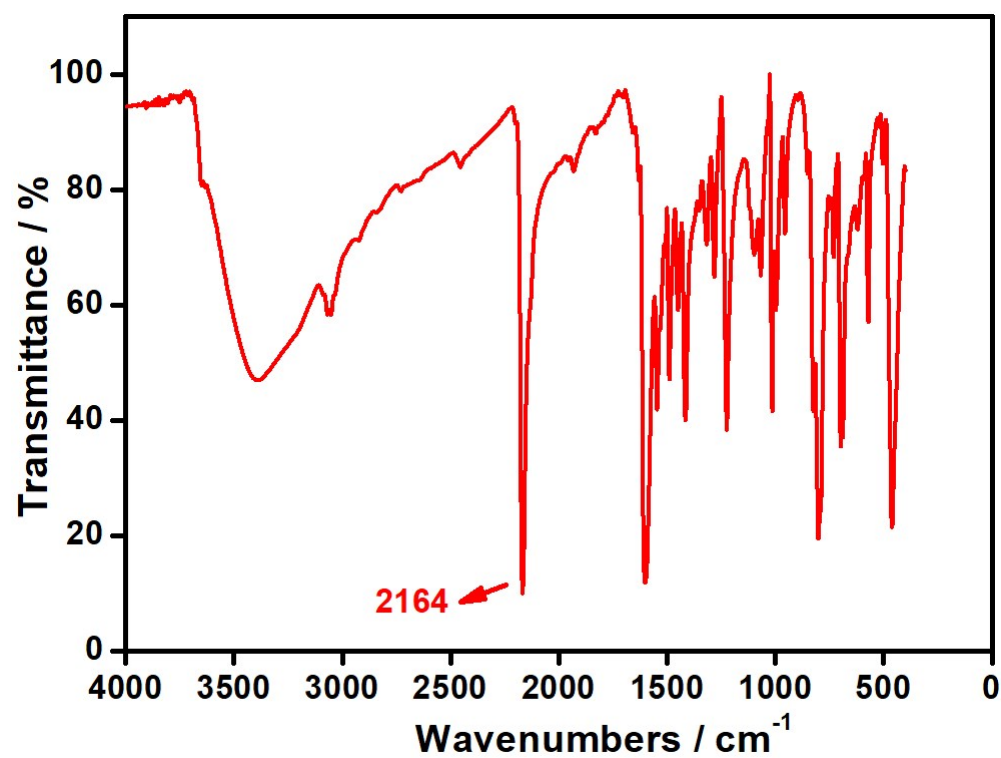

(b)

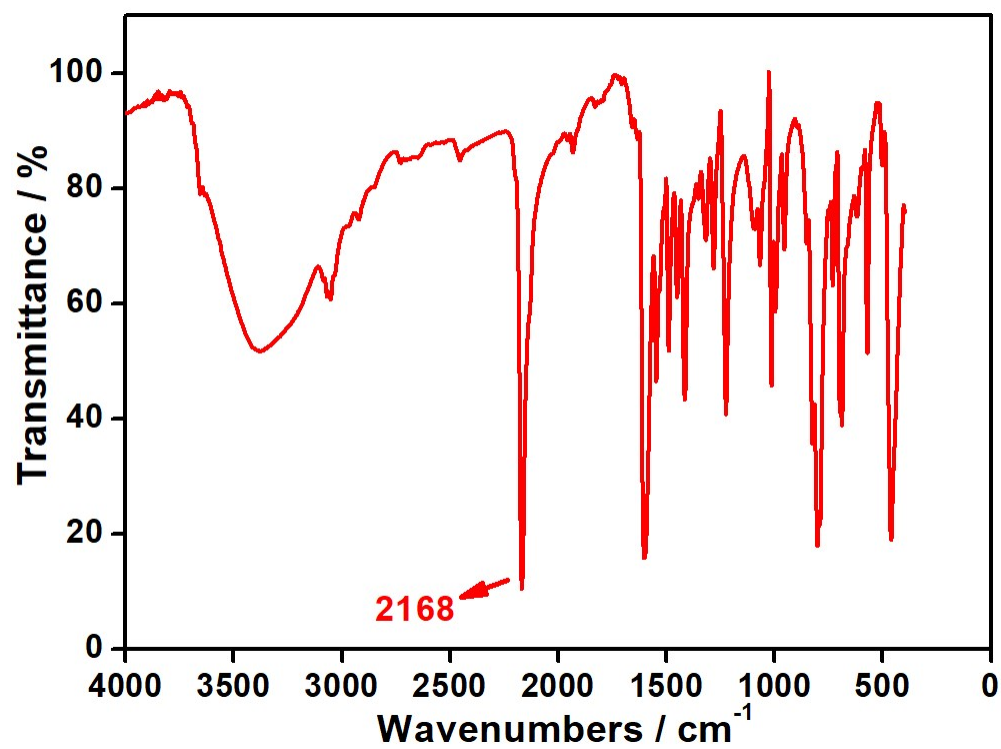

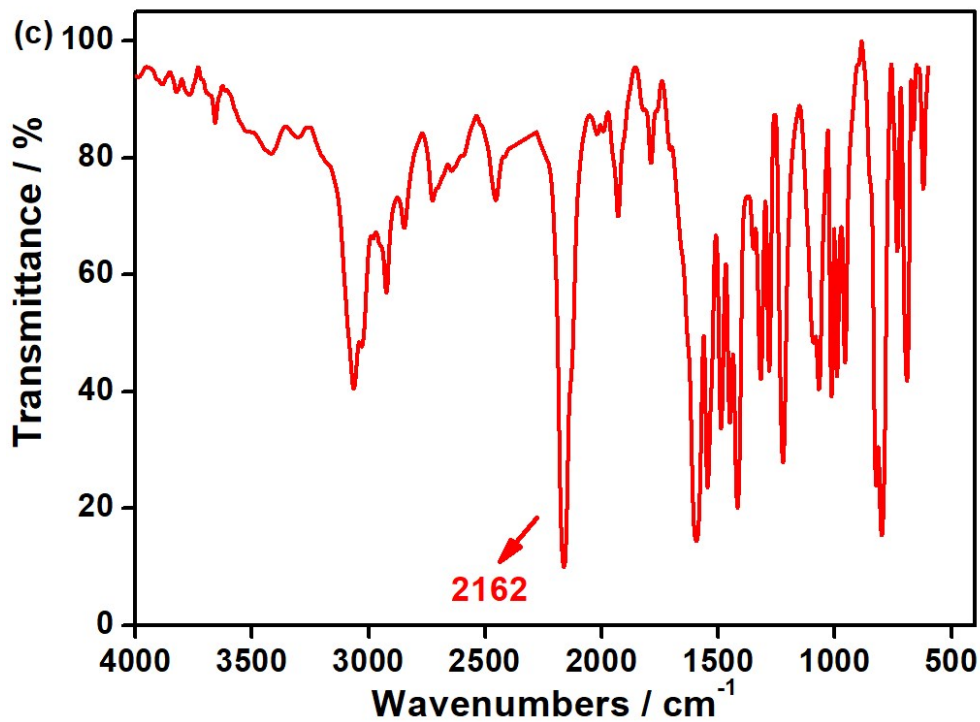

**Figure S2.** The FT-IR spectra of **1·dpt·2.5H<sub>2</sub>O** (a), **1·dpt·1.5H<sub>2</sub>O** (b) and **1·dpt** (c). The characteristic band at 2164 cm<sup>-1</sup> in **1·dpt·2.5H<sub>2</sub>O**, 2168 cm<sup>-1</sup> in **1·dpt·1.5H<sub>2</sub>O** and 2162 cm<sup>-1</sup> in **1·dpt** are attributed to the stretching vibration of cyano group. **1·dpt** was obtained by heating the old samples of **1·dpt·1.5H<sub>2</sub>O** (aged about half a year) at 107 °C on a BRUKER VERTEX70 FT-IR spectrometer.

(a)

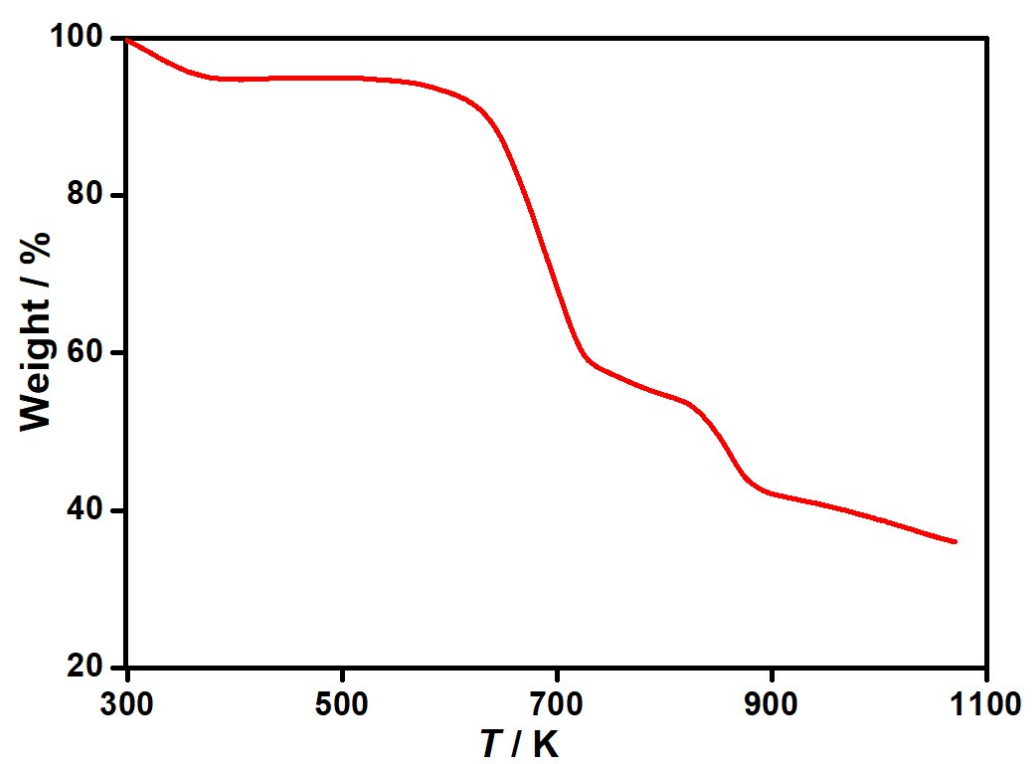

(b)

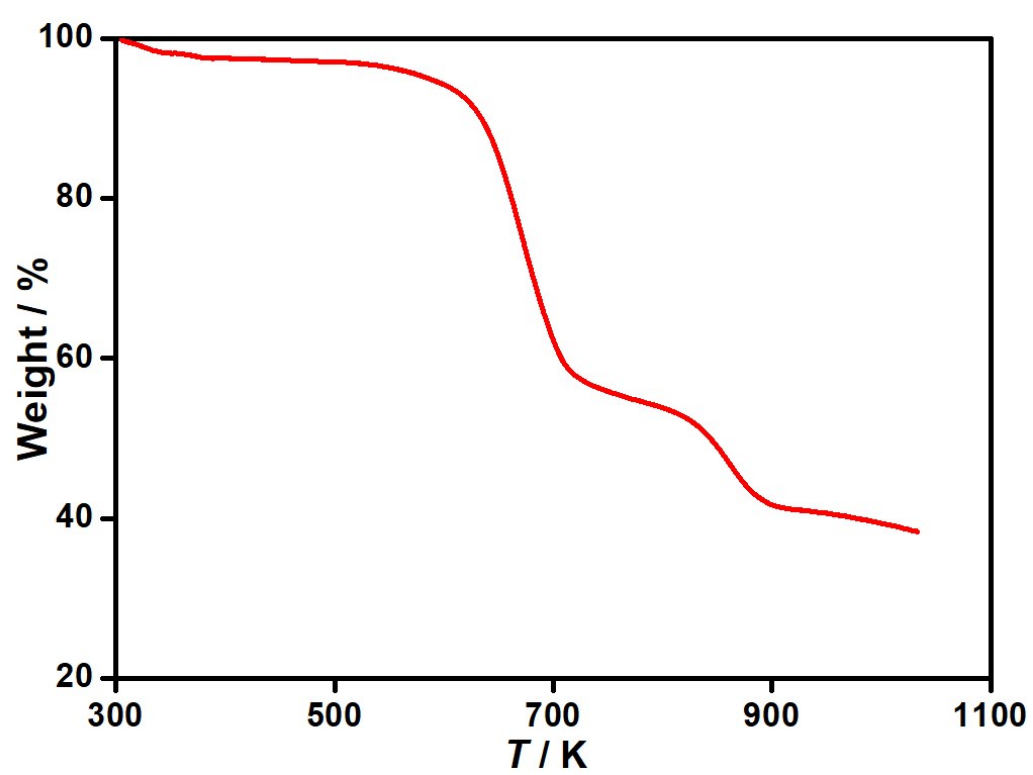

(c)

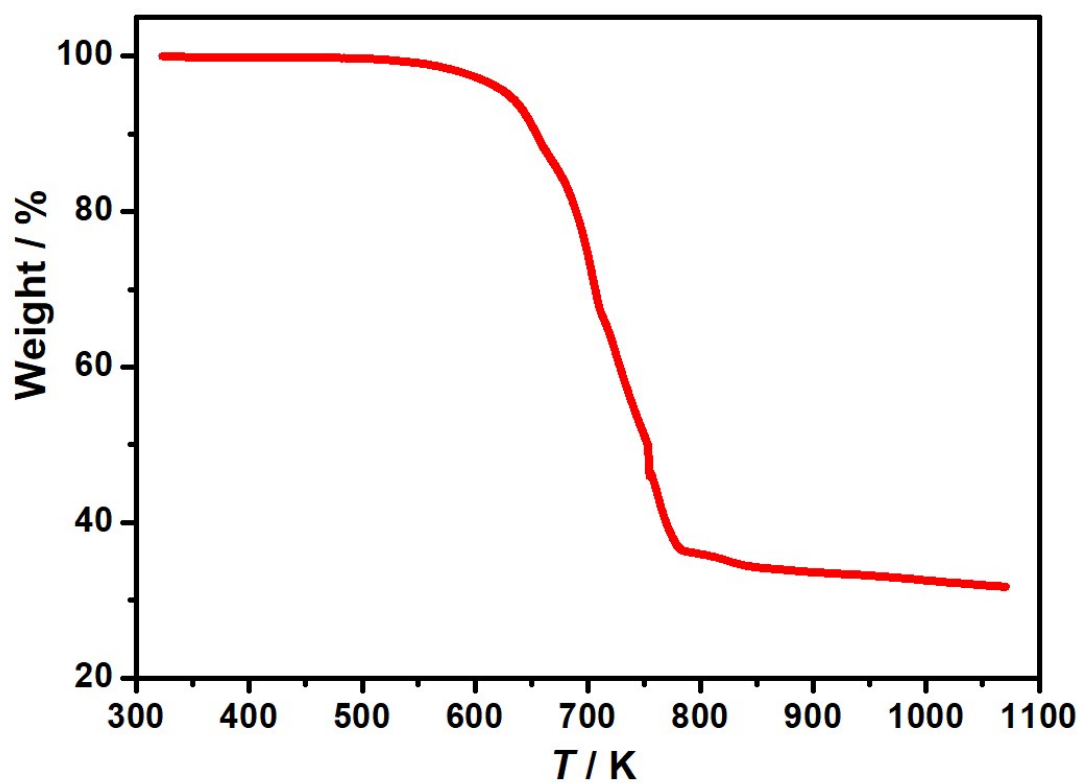

**Figure S3.** Thermogravimetric analyses of  $1 \cdot \text{dpt} \cdot 2.5\text{H}_2\text{O}$  (a),  $1 \cdot \text{dpt} \cdot 1.5\text{H}_2\text{O}$  (b) and  $1 \cdot \text{dpt}$  (c). The weight loss of  $1 \cdot \text{dpt} \cdot 2.5\text{H}_2\text{O}$  (5.04 %) and  $1 \cdot \text{dpt} \cdot 1.5\text{H}_2\text{O}$  (3.00 %) are close to the weight percent of 2.5  $\text{H}_2\text{O}$  (5.13 %) and 1.5  $\text{H}_2\text{O}$  (3.14 %). The fully dehydrated phase  $1 \cdot \text{dpt}$  was obtained by heating the old samples of  $1 \cdot \text{dpt} \cdot 1.5\text{H}_2\text{O}$  (aged about half a year) at 107 °C for 2.5 h.

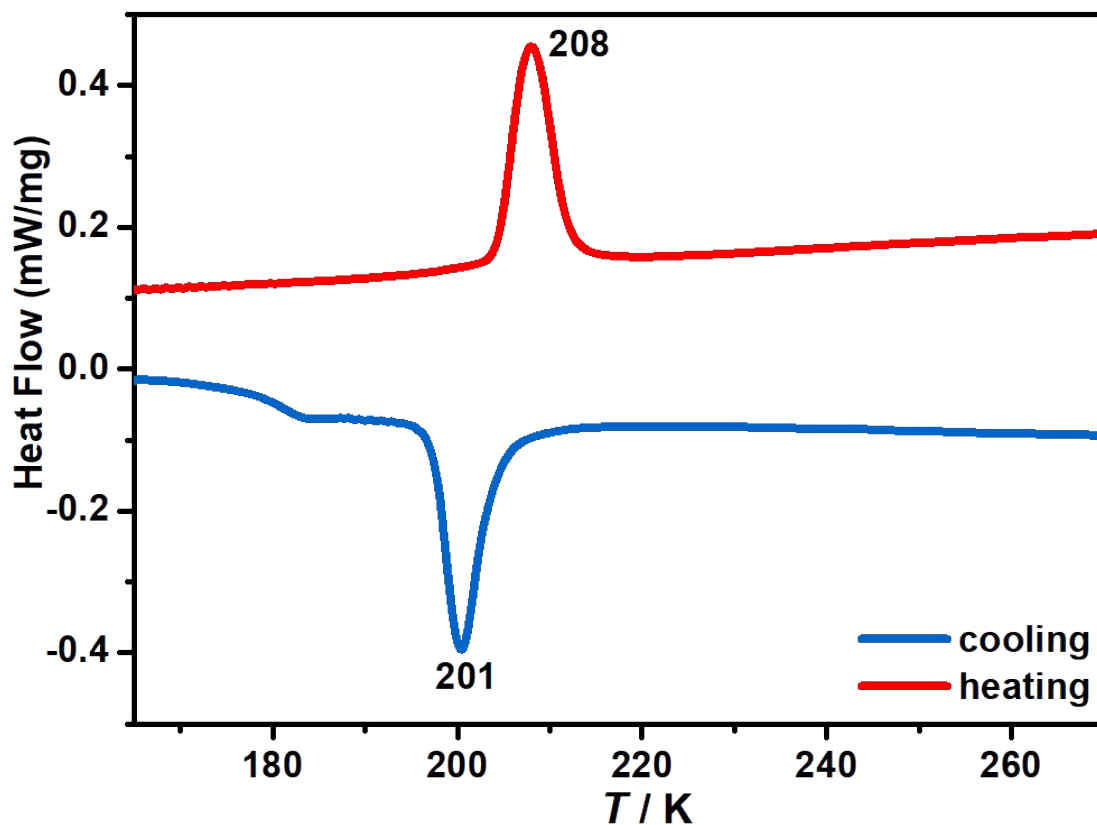

**Figure S4.** The differential scanning calorimetry (DSC) curves at  $10 \text{ K min}^{-1}$  for  $\mathbf{1 \cdot dpt \cdot 1.5H_2O}$  in the cooling (blue) and warming (red) modes. The exothermic peak at 201 K and endothermic peak at 208 K in DSC curve are close to the  $T_c$  values for the first-step spin transition from the magnetic susceptibility data. However, the  $T_c$  values for the second-step spin transition are too low to be measured in the DSC instrument. As for the humid samples of  $\mathbf{1 \cdot dpt \cdot 2.5H_2O}$ , the freezing point of mother liquor (equal volume of methanol and water) will affect the DSC curve, which can't be obtained accurately.



(a)

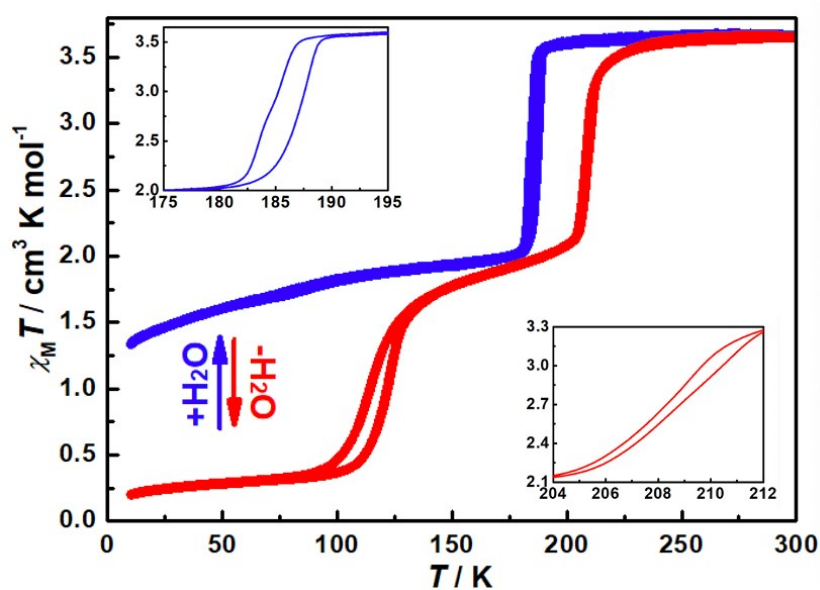

(b)

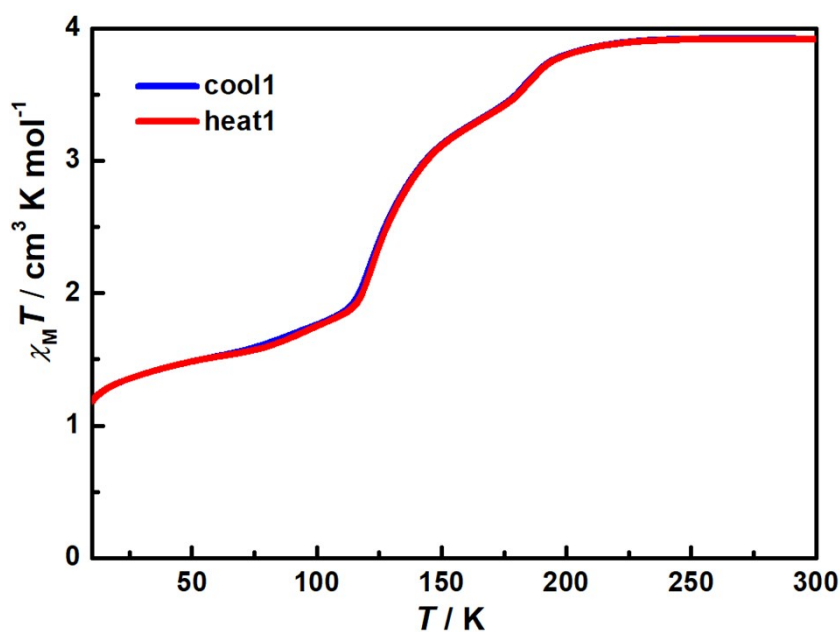

**Figure S5.** Temperature-dependence magnetic susceptibility data for **1·dpt·2.5H<sub>2</sub>O** (blue) and **1·dpt·1.5H<sub>2</sub>O** (red) at 2 K min<sup>-1</sup> (a) and for **1·dpt** in settle mode (b). The inset graph illustrates the hysteresis loop for **1·dpt·2.5H<sub>2</sub>O** (up) and **1·dpt·1.5H<sub>2</sub>O** (down). **1·dpt** is generated by heating the old samples of **1·dpt·1.5H<sub>2</sub>O** (aged about half a year) at 107 °C for 2.5 h on the SQUID magnetometer. The spin crossover behavior of **1·dpt** can be reproduced, although the  $\chi_M T$  values at low temperatures for **1·dpt** generated from the aged samples of **1·dpt·1.5H<sub>2</sub>O** are slightly higher than those for **1·dpt** generated from the fresh samples of **1·dpt·1.5H<sub>2</sub>O**.

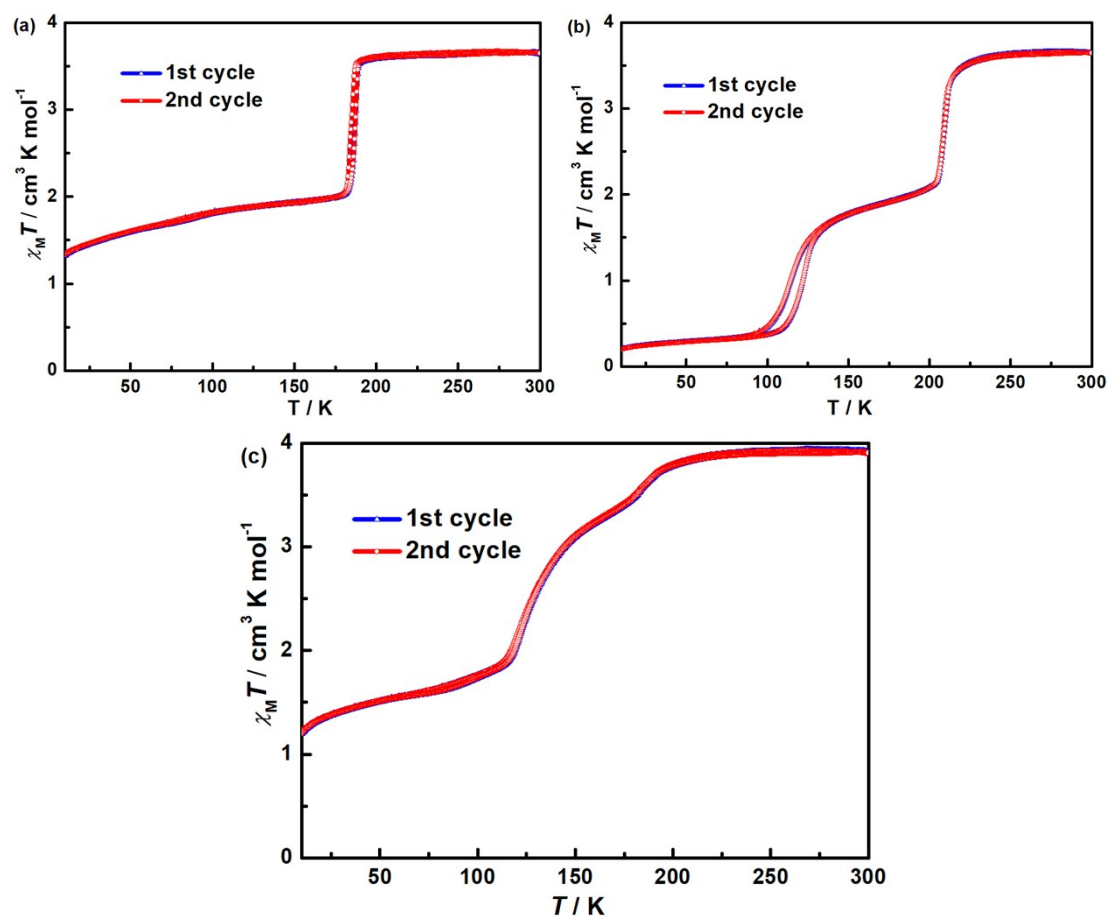

Figure S6. Variable-temperature magnetic susceptibility with two consecutive cycles for  $1 \cdot \text{dpt} \cdot 2.5\text{H}_2\text{O}$  (a),  $1 \cdot \text{dpt} \cdot 1.5\text{H}_2\text{O}$  (b) and  $1 \cdot \text{dpt}$  (c) at the scanning rate of  $2 \text{ K min}^{-1}$ .  $1 \cdot \text{dpt}$  is generated by heating the old samples of  $1 \cdot \text{dpt} \cdot 1.5\text{H}_2\text{O}$  (aged about half a year) at  $107 \text{ }^\circ\text{C}$  for 2.5 h on the SQUID magnetometer.

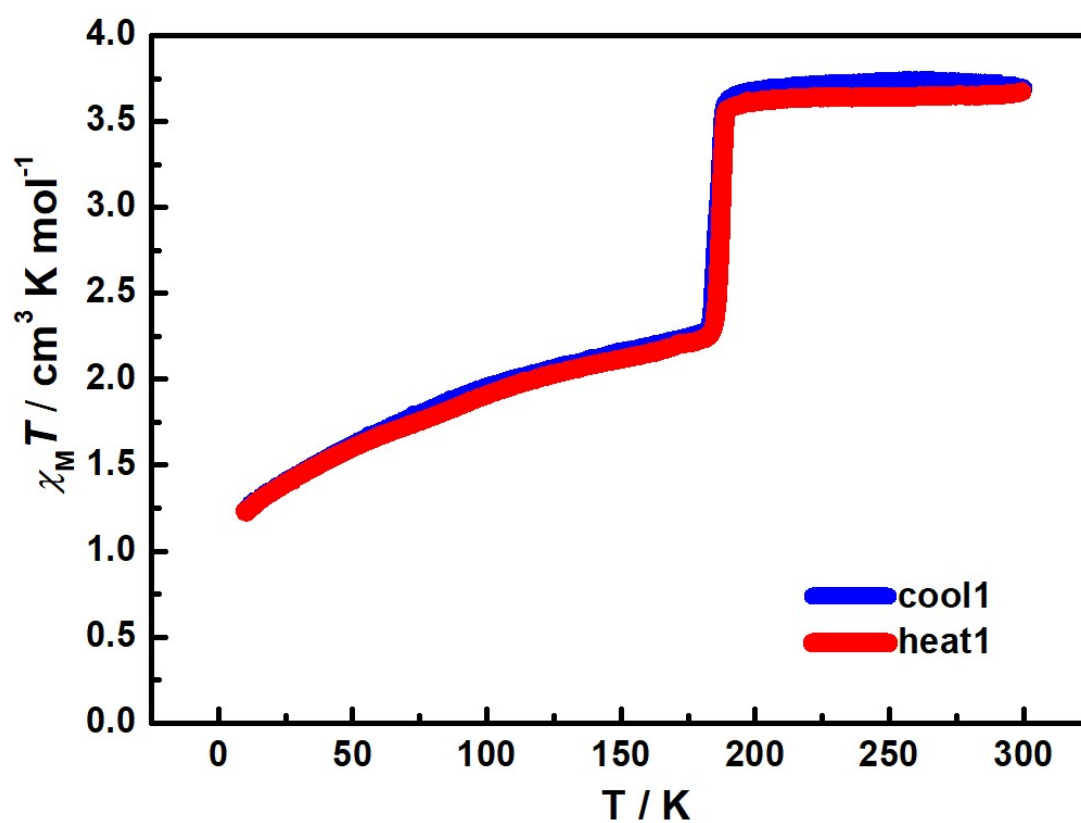

**Figure S7.** Temperature-dependence magnetic susceptibility data at  $2 \text{ K min}^{-1}$  for the water re-adsorption phase  $1 \cdot \text{dpt} \cdot 2.5\text{H}_2\text{O}$ , which is obtained by soaking  $1 \cdot \text{dpt} \cdot 1.5\text{H}_2\text{O}$  in water.

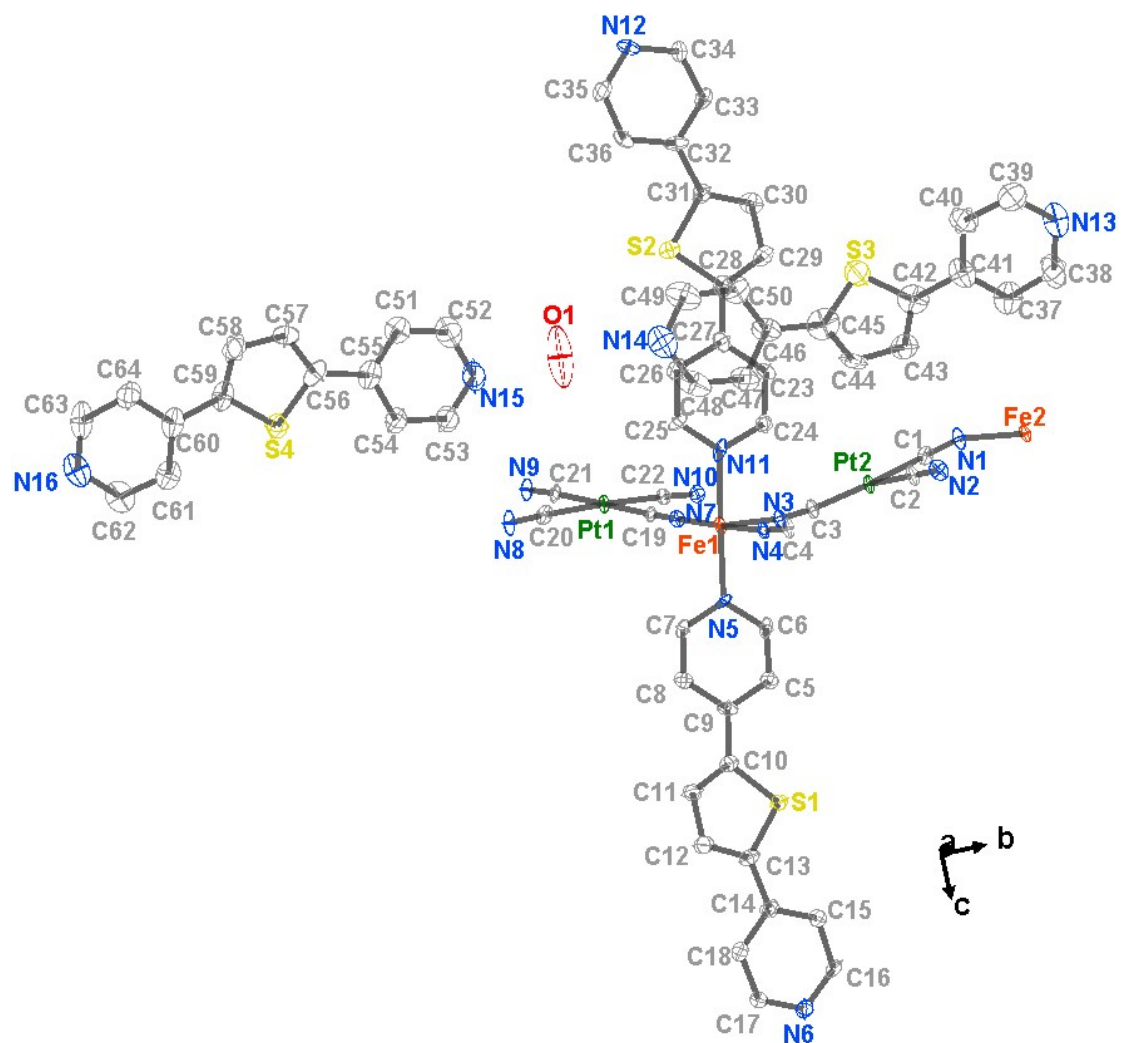

**Figure S8.** Asymmetric unit of  $1 \cdot \text{dpt} \cdot 2.5\text{H}_2\text{O}$  at 150 K. Thermal ellipsoids are drawn at the 30 % probability. Hydrogen atoms are omitted for clarity.

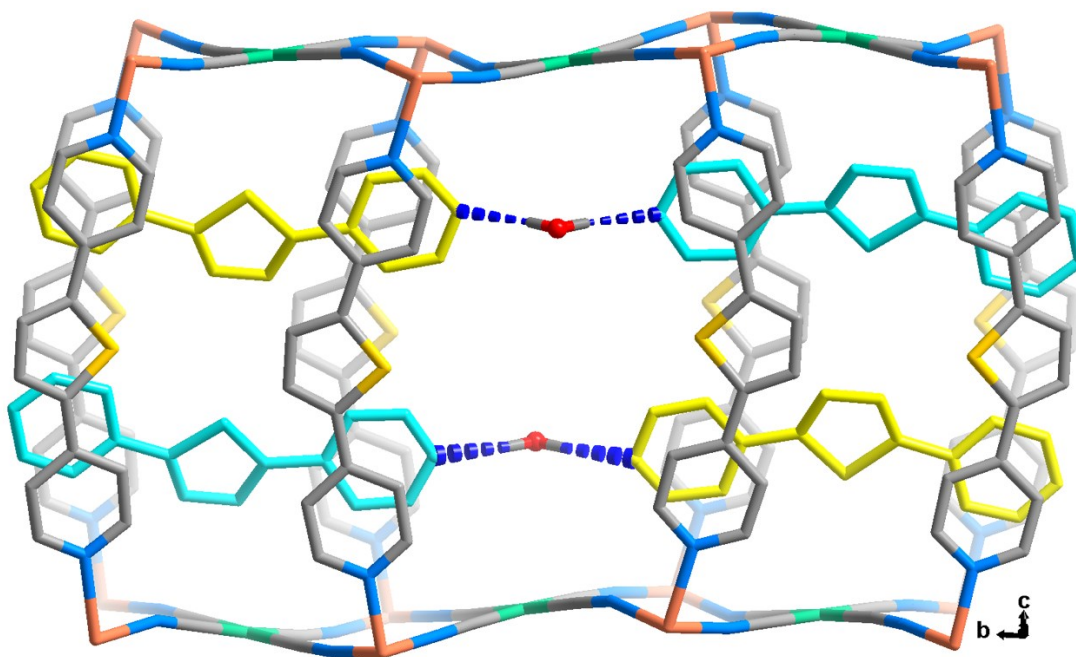

**Figure S9.** Structure representations along the *a*-axis for  $1 \cdot \text{dpt} \cdot 2.5\text{H}_2\text{O}$  at 150 K. The hydrogen-bonding interactions between water and the uncoordinated dpt ligands (dpt3, turquoise; dpt4, yellow) are shown as the blue dashed lines. Hydrogen atoms except water are omitted for clarity. Color codes: Fe, orange; Pt, green; N, blue; C, grey; S, yellow; O, red.

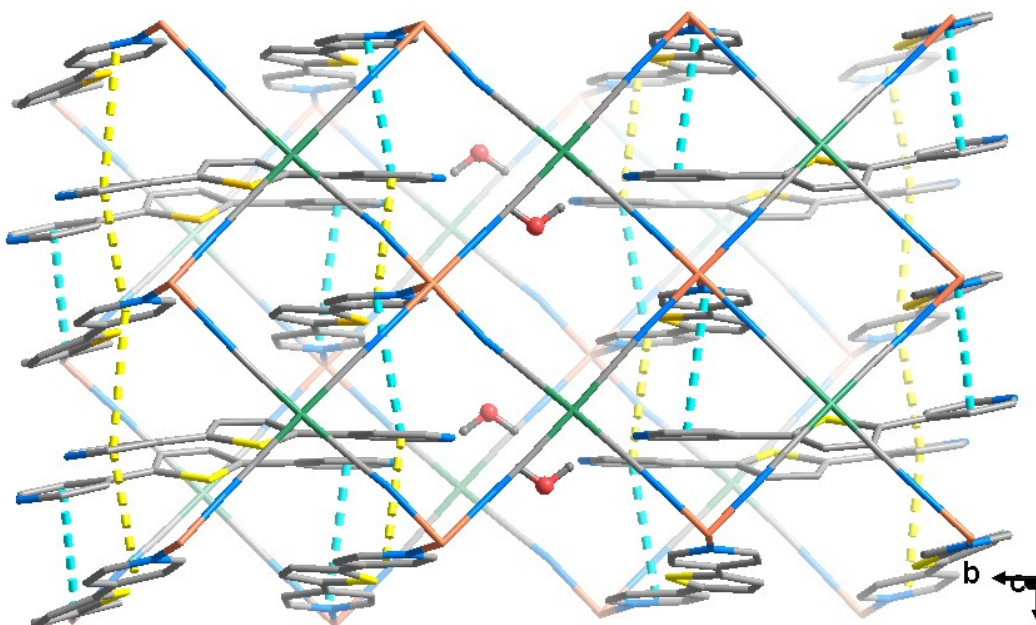

**Figure S10.** Offset face-to-face (yellow dashed lines) and face-to-face  $\pi \cdots \pi$  interactions (turquoise dashed lines) in  $1 \cdot \text{dpt} \cdot 2.5\text{H}_2\text{O}$  at 150 K along the *c* axis.

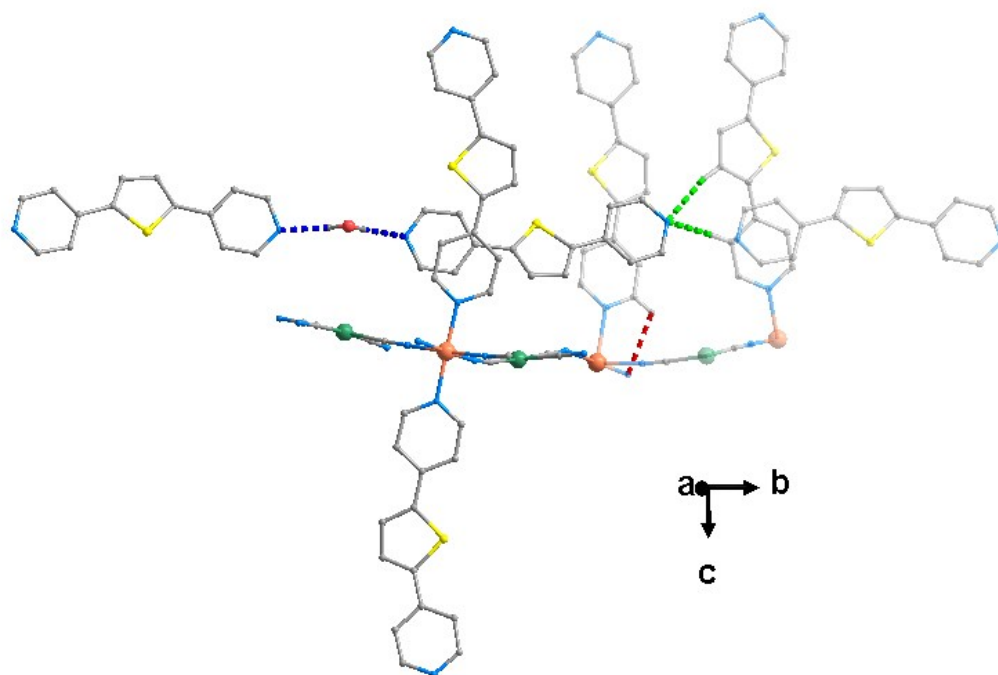

**Figure S11.** The bifurcated H-bonds (C8–H8···N13···H11–C11, green dashed lines), the strong H-bonds (O1–H···N14 and O1–H···N15, blue dashed lines) and the H-bonds of C17–H17···N9 (red dashed lines) in **1·dpt·2.5H<sub>2</sub>O** at 150 K. The molecules in the asymmetric unit are highlighted while the molecules generated by the symmetry codes are translucent. Only the hydrogen atoms involving the hydrogen-bonding interactions are shown while the others are omitted for clarity. Color codes: Fe, orange; Pt, green; O, red; C, grey; N, blue; H, dark grey.

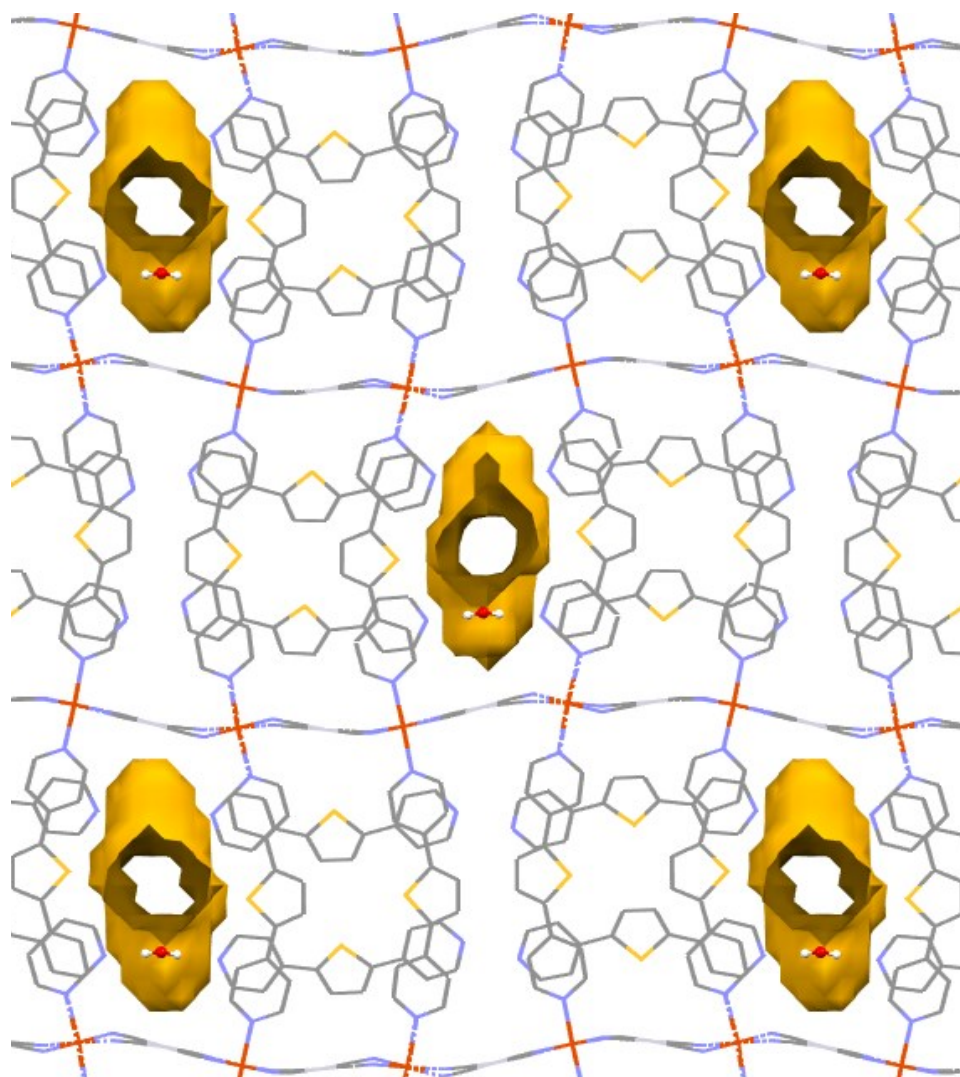

**Figure S12.** The voids along the *a*-axis in the framework of  $1 \cdot \text{dpt} \cdot 2.5\text{H}_2\text{O}$  at 150 K.

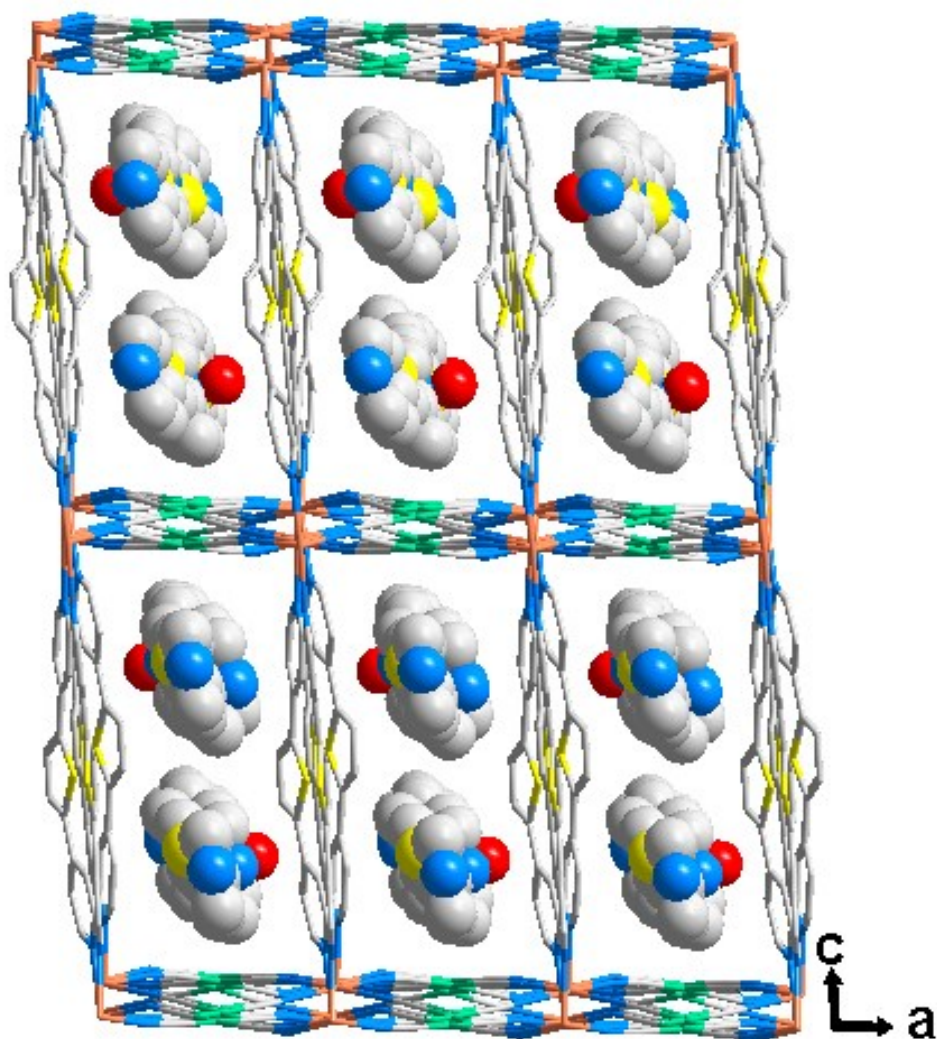

**Figure S13.** The uncoordinated dpt ligands (space-filling) and  $\text{H}_2\text{O}$  in the 1D channels along the  $b$ -axis within the 3D framework of  $1 \cdot \text{dpt} \cdot 2.5\text{H}_2\text{O}$  at 150 K. Hydrogen atoms are omitted for clarity.



(a)

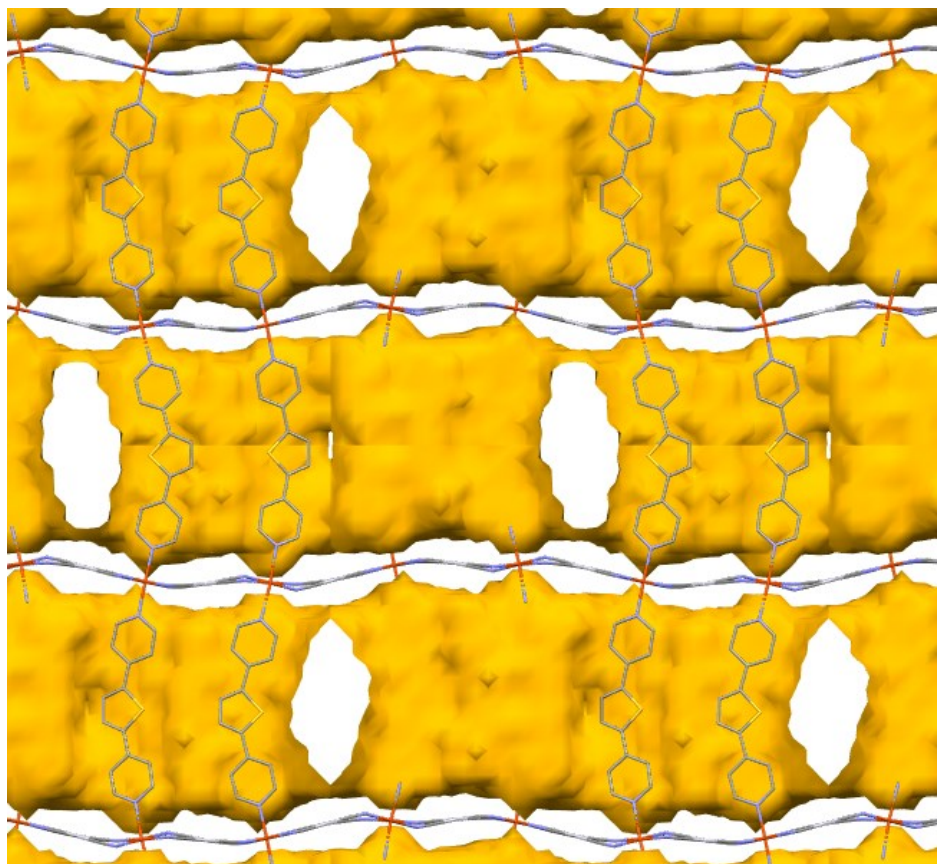

(b)

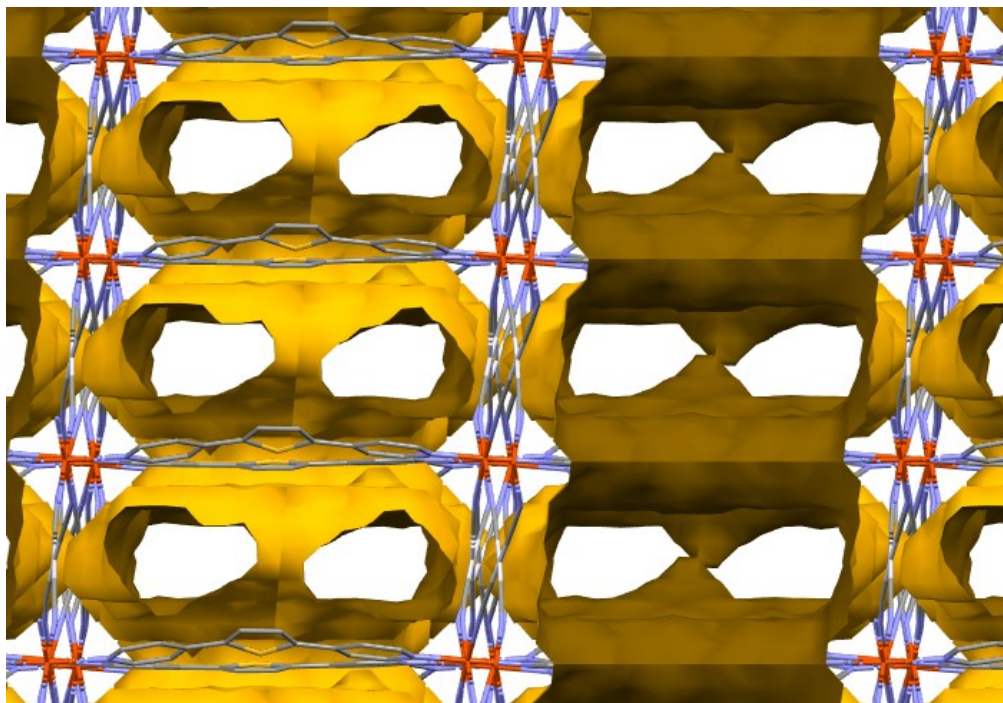

**Figure S14.** 1D channels along the  $a$ -axis (a) and the  $b$ -axis (b) for  $1 \cdot \text{dpt} \cdot 2.5\text{H}_2\text{O}$  at 150 K after removing the uncoordinated dpt ligands and  $\text{H}_2\text{O}$ .

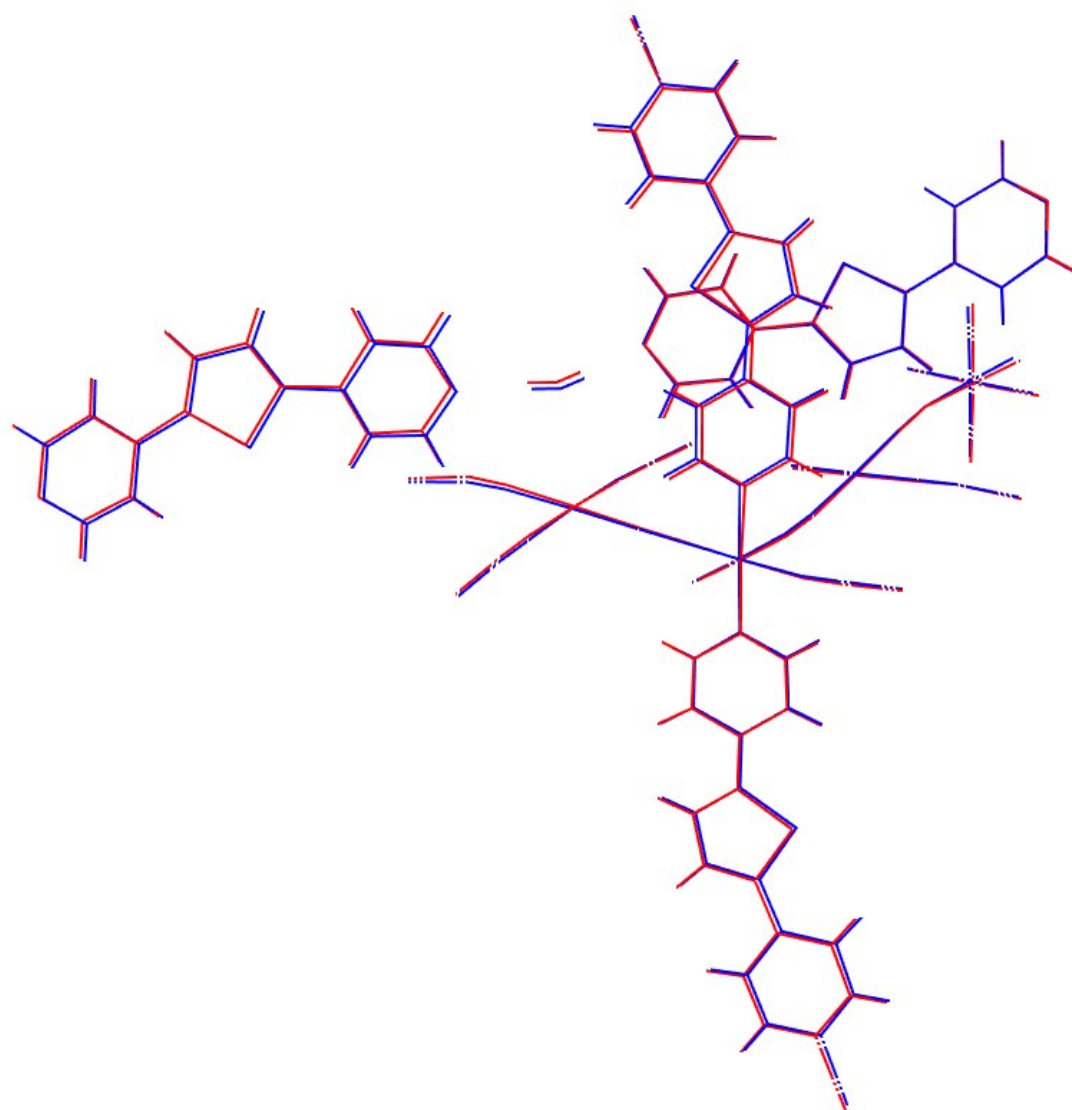

**Figure S15.** The structural overlap for the asymmetric units of  $1 \cdot \text{dpt} \cdot 2.5\text{H}_2\text{O}$  (red) and  $1 \cdot \text{dpt} \cdot 1.5\text{H}_2\text{O}$  (blue) at 80 K.
